# Supplementary material for: Land Subsidence Phenomena vs. Coastal Flood Hazard—The Cases of Messolonghi and Aitolikon (Greece)
Source: MDPI journal article supplement (doi:10.3390/rs15082112), 2023-04-17
Supplement: s1 [file s1]

## Supplementary Material for

# Land Subsidence Phenomena Vs Coastal Flood Hazard - The Cases of Messolonghi and Aitolikon (Greece)

Nikolaos Antoniadis <sup>1</sup>, Stavroula Alatza <sup>2</sup>, Constantinos Loupasakis<sup>1\*</sup> and Charalampos (Haris) Kontoes<sup>2</sup>

<sup>1</sup> School of Mining and Metallurgical Engineering, Department of Geological Sciences, Zographou Campus, National Technical University of Athens, GR-157 80 Athens, Greece; antoniadis.nickolas@gmail.com (N.A.)

<sup>2</sup> National Observatory of Athens, Operational Unit BEYOND Centre for Earth Observation Research and Satellite Remote Sensing IAASARS/NOA, GR-152 36 Athens, Greece; alatza@noa.gr (S.A.); kontoes@noa.gr (C.K.)

\* Correspondence: cloupasakis@metal.ntua.gr

Pdf Supplementary Material (SM) for the manuscript includes:

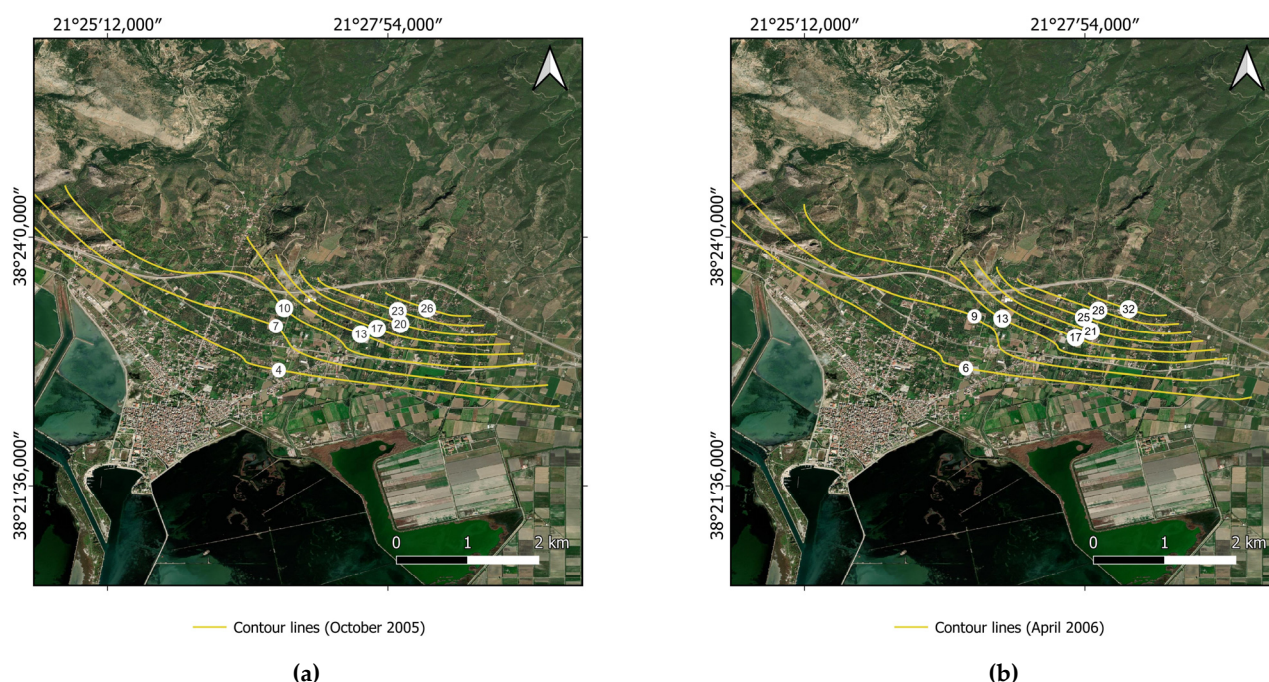

(a)

(b)

**Figure S1.** Ground water level contour lines for (a) October 2005 and (b) April 2006. Produced by evaluating the raw data coming from the study of Lemesios (2006) [42].

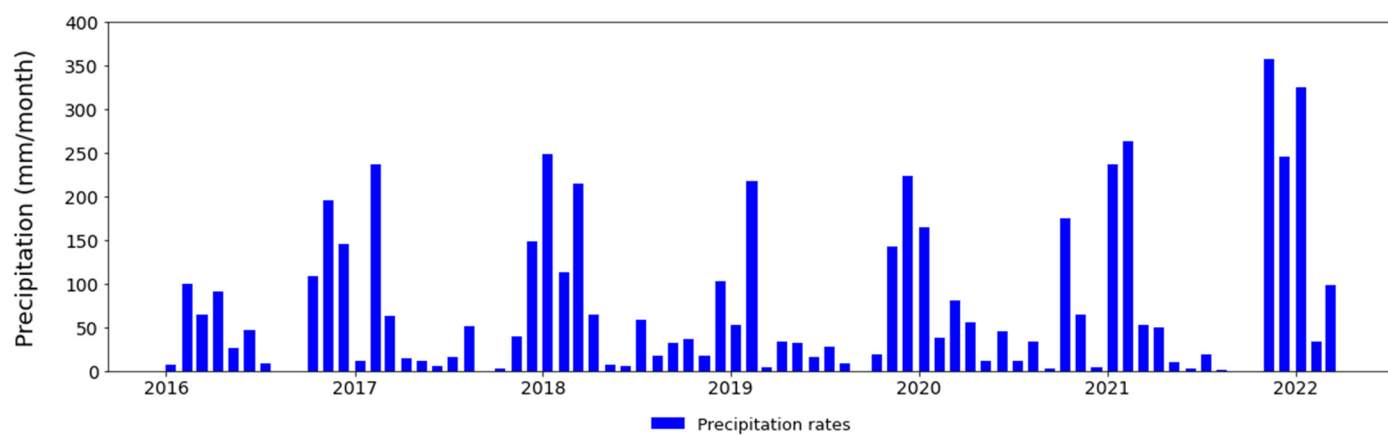

**Figure S2.** Monthly precipitation rates recorded by the Aitolikon weather station [63]. Each blue bar represent the precipitation rates for 1 month

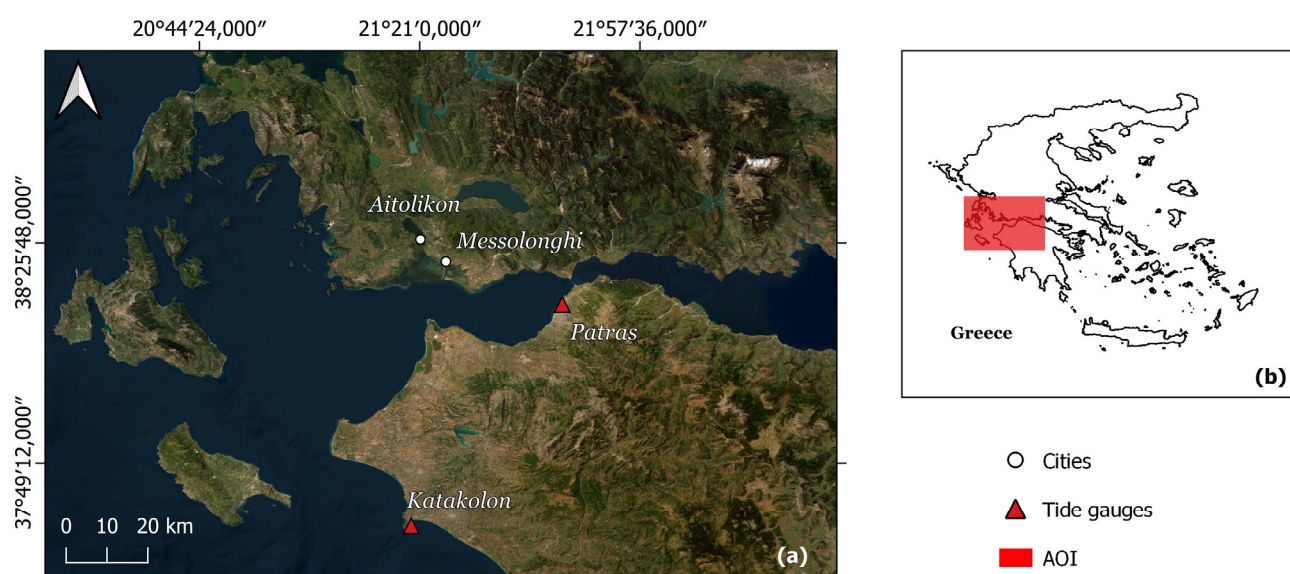

**Figure S3.** Patra and Katakolon tidal gauges locations.

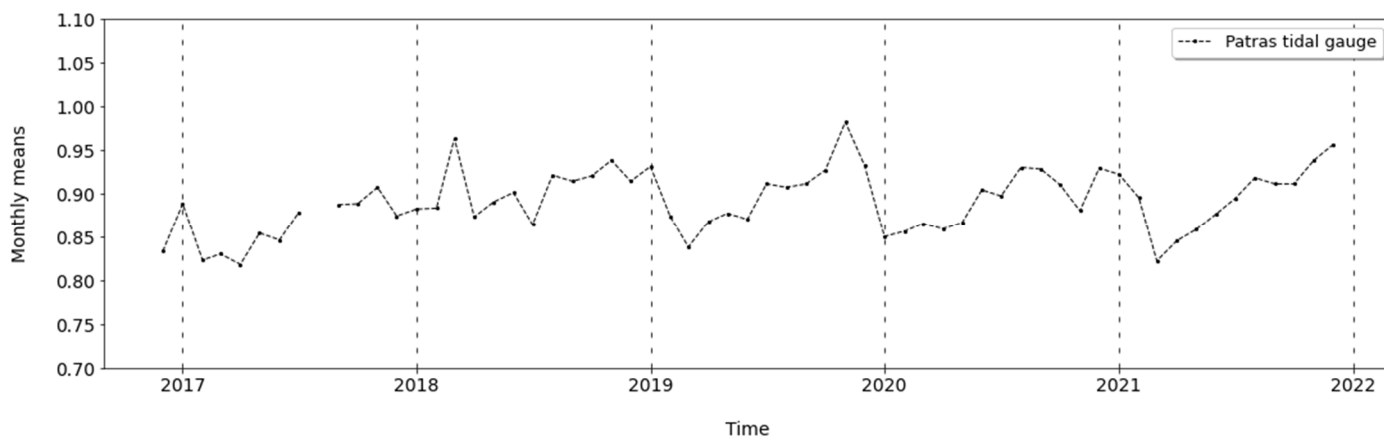

**Figure S4.** Patra's tidal gauge timeseries.

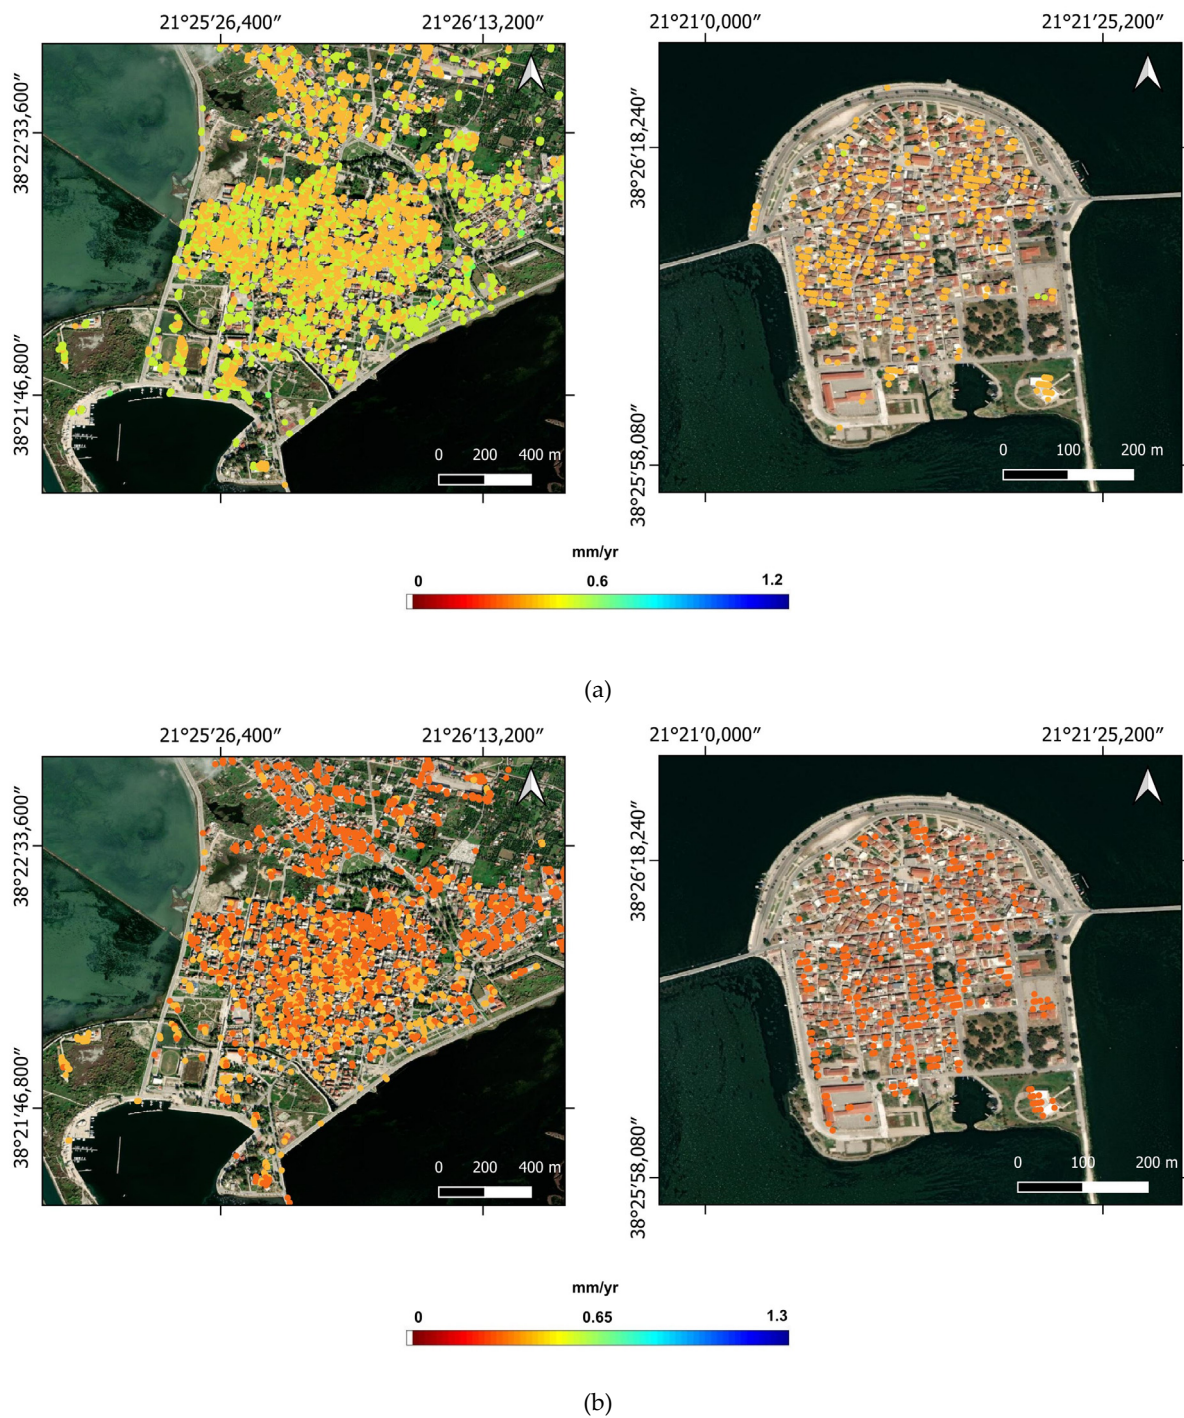

**Figure S5.** Standard deviation values for the (a) descending & (b) ascending track.



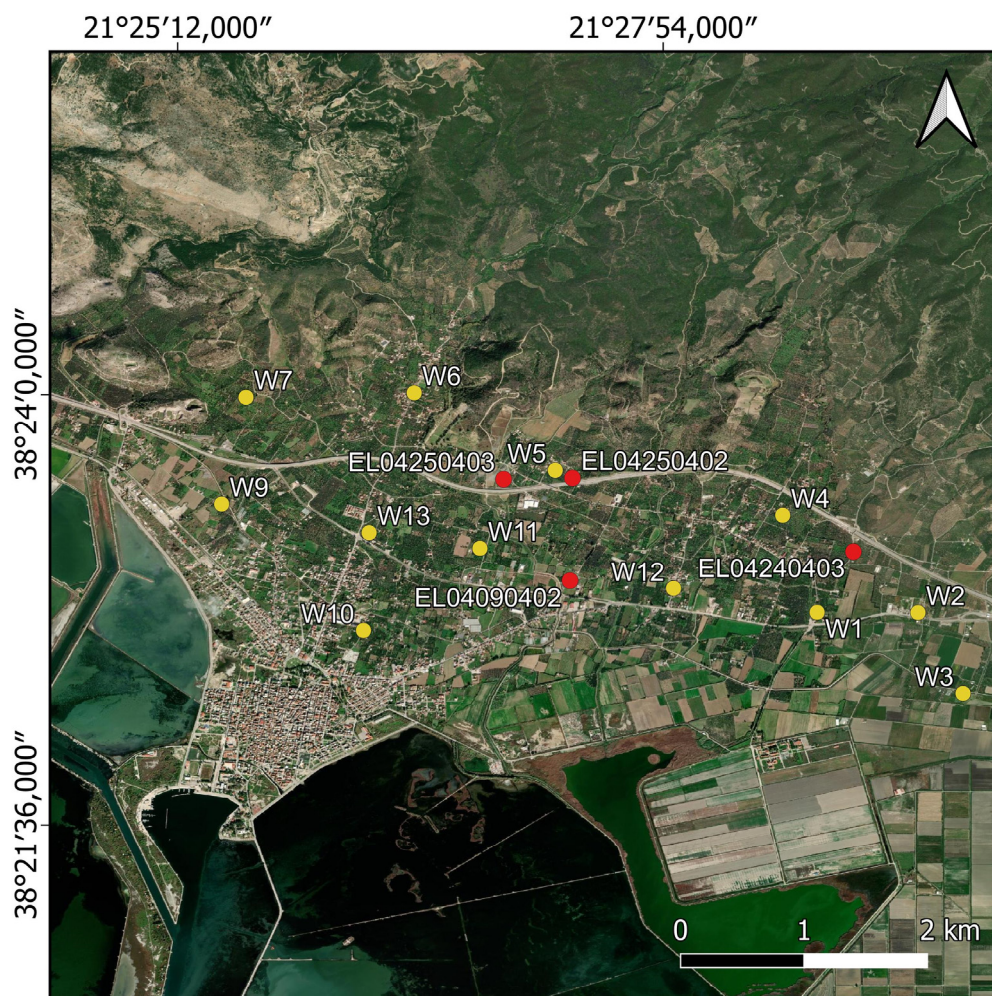

### Hydrogeological Boreholes

- Groundwater Monitoring Network - DIPYN (EAGME)
- Lemesios (2008)

**Figure S6.** The location of the boreholes used by Lemesios (2006) [42] at 2005–2006 (yellow dots) and since 2015 by HSGME (red dots) [72].

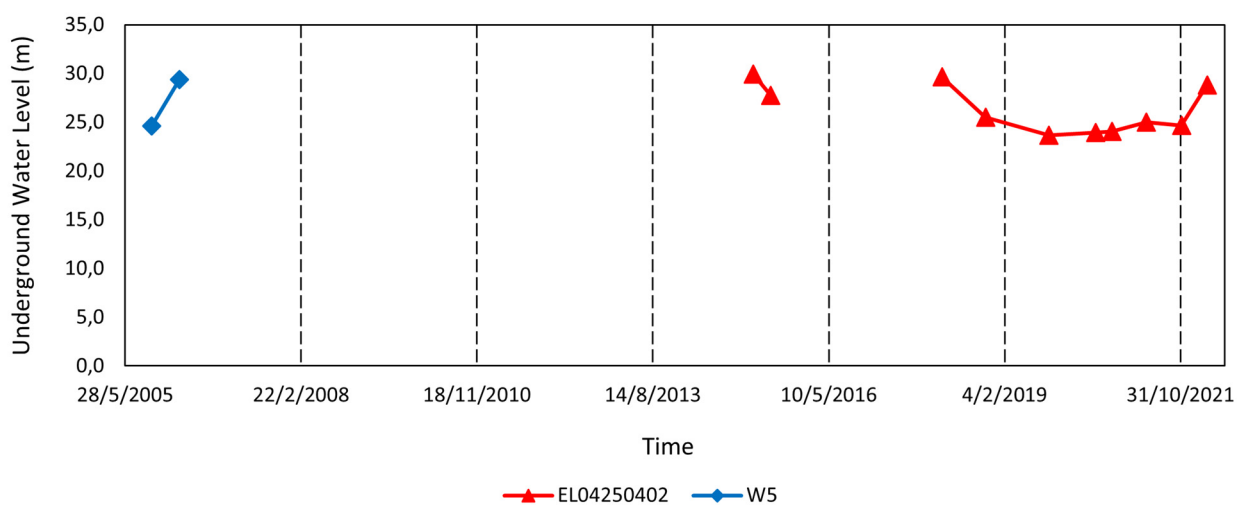

(a)

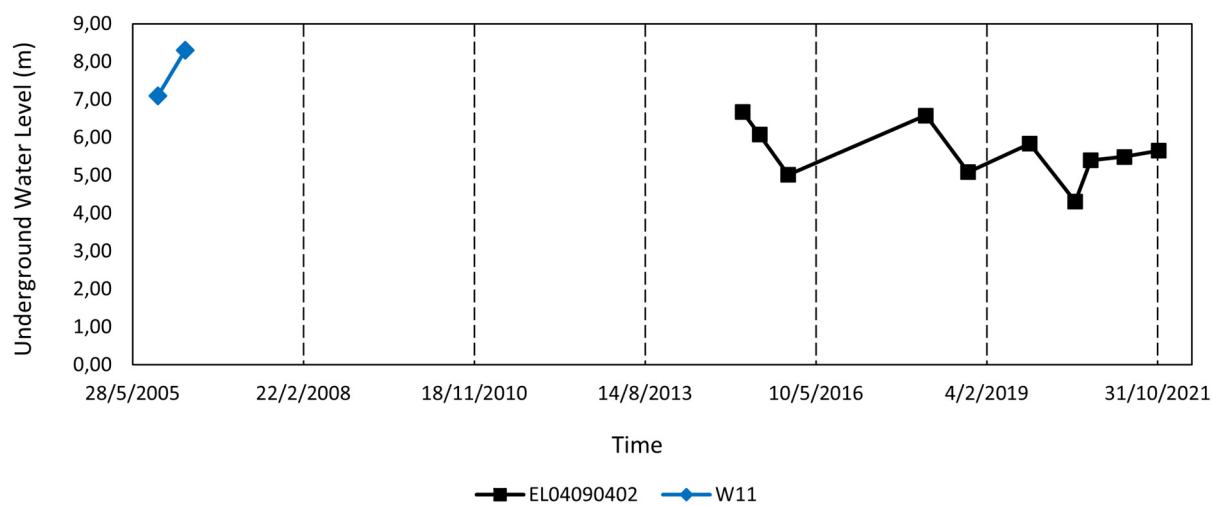

(b)

**Figure S7.** (a) Ground water level for boreholes EL04250402 and W5 (b) Ground water level for boreholes EL04090402 and W11.

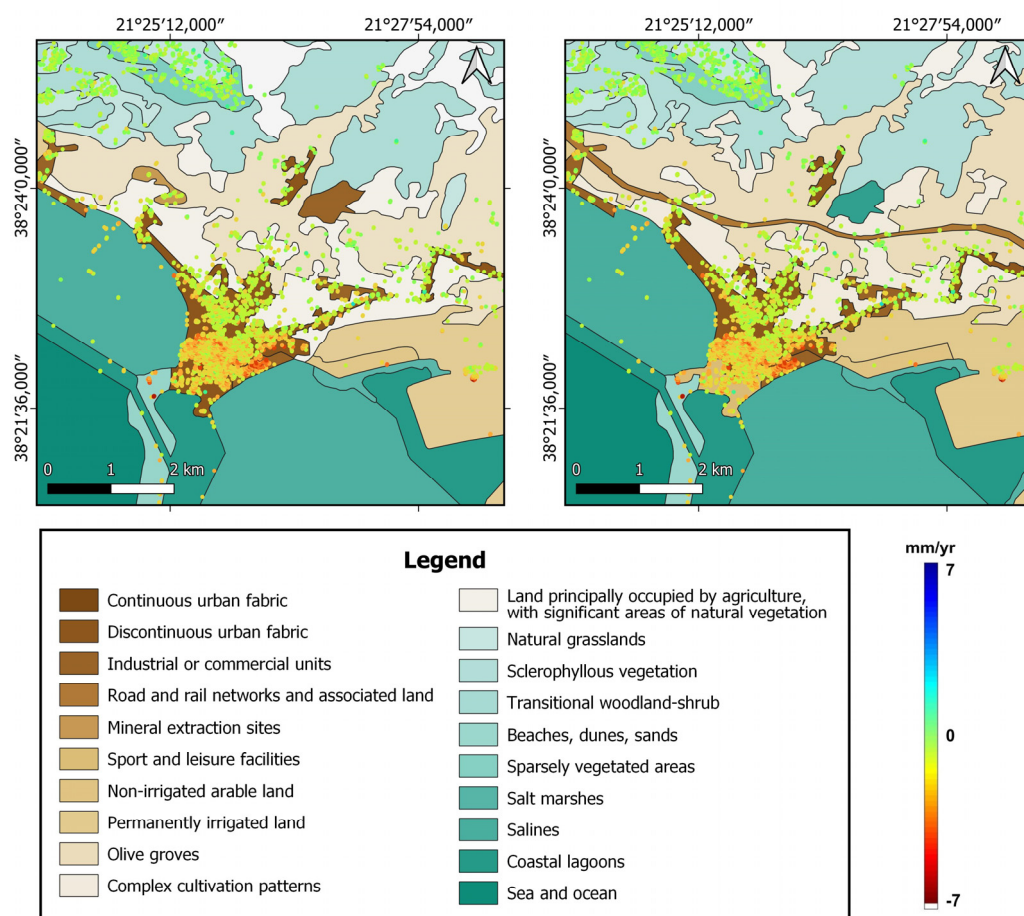

**Figure S8.** (a) Land use for the greater area of Messolonghi in 2006 and descending track LOS displacements (b) Land use for the greater area of Messolonghi in 2018 and descending track LOS displacements.

**Table S1.** Physical and mechanical properties of Silt and Silty Sand foundation formations of Messo-longhi.

|                                                    | <b>Silt</b><br>Unified Soil Classification System (USCS) classification<br>CL, ML |         |      | <b>Silty Sand</b> |         |       |
|----------------------------------------------------|-----------------------------------------------------------------------------------|---------|------|-------------------|---------|-------|
|                                                    | Min                                                                               | Average | Max  | Min               | Average | Max   |
| Physical Parameters                                |                                                                                   |         |      |                   |         |       |
| Liquid Limit, LL (%)                               | 22.8                                                                              | 24.6    | 27.8 | -                 | 30.4    | -     |
| Plasticity Limit, PL (%)                           | 5.6                                                                               | 14.7    | 16.4 | -                 | 18      | -     |
| Sat. unit weight, $\gamma$<br>(kN/m <sup>3</sup> ) | 20.3                                                                              | 20.7    | 21.4 | -                 | 20.3    | -     |
| Mechanical Parameters                              |                                                                                   |         |      |                   |         |       |
| Initial void ration, e                             | -                                                                                 | -       | -    | -                 | -       | -     |
| Compression index, $C_c$                           | -                                                                                 | -       | -    | 0.16              | 0.334   | 0.467 |
| Shear Box Test                                     |                                                                                   |         |      |                   |         |       |
| Cohesion, c (kN/m <sup>2</sup> )                   | -                                                                                 | -       | -    | -                 | -       | -     |
| Friction angle, $\varphi$                          | -                                                                                 | -       | -    | -                 | -       | -     |
| Standard Penetration Test                          |                                                                                   |         |      |                   |         |       |
| $N_{SPT}$                                          | 16                                                                                | 21      | 31   | -                 | 16      | -     |

**Table S2.** Physical and mechanical properties of Silty Clay and Sandy Clay foundation formations of Messolonghi.

|                                                    | <b>Silty Clay</b><br>Unified Soil Classification System (USCS) classification<br>CL, ML |         |       | <b>Sandy Clay</b> |         |       |
|----------------------------------------------------|-----------------------------------------------------------------------------------------|---------|-------|-------------------|---------|-------|
|                                                    | Min                                                                                     | Average | Max   | Min               | Average | Max   |
| Physical Parameters                                |                                                                                         |         |       |                   |         |       |
| Liquid Limit, LL (%)                               | 26                                                                                      | 33.9    | 39    | -                 | 31.7    | -     |
| Plasticity Limit, PL (%)                           | 17                                                                                      | 17.8    | 19    | -                 | 15      | -     |
| Sat. unit weight, $\gamma$<br>(kN/m <sup>3</sup> ) | 18.5                                                                                    | 19.5    | 20.3  | -                 | -       | -     |
| Mechanical Parameters                              |                                                                                         |         |       |                   |         |       |
| Initial void ration, e                             | -                                                                                       | 0.8     | -     | 1                 | -       | 0.84  |
| Compression index, $C_c$                           | 0.286                                                                                   | 0.318   | 0.373 | 0.328             | -       | 0.187 |
| UC Strength, $q_u$ (kPa)                           | -                                                                                       | -       | -     | -                 | -       | 0.84  |
| Shear Box Test                                     |                                                                                         |         |       |                   |         |       |
| Cohesion, c (kN/m <sup>2</sup> )                   | -                                                                                       | -       | -     | 1.89              | 7.82    | 17.76 |
| Friction angle, $\varphi$                          | -                                                                                       | -       | -     | 3.7               | 13      | 22.1  |
| Standard Penetration Test                          |                                                                                         |         |       |                   |         |       |
| $N_{SPT}$                                          | -                                                                                       | -       | -     | -                 | 17      | -     |

**Table S3.** Hydrogeological boreholes data from HSGME and Lemesios (2006).

| HSGME      |               |                 | Lemesios (2006) |               |                 |
|------------|---------------|-----------------|-----------------|---------------|-----------------|
| Date       | Borehole code | Water level (m) | Date            | Borehole code | Water level (m) |
| 9/3/2015   | EL04090402    | 6.68            | 24/10/2005      | W5            | 24.6            |
| 15/6/2015  | EL04090402    | 6.08            | 1/4/2006        | W5            | 29.4            |
| 30/11/2015 | EL04090402    | 5.01            | 24/10/2005      | W11           | 7.1             |
| 12/2/2018  | EL04090402    | 6.58            | 1/4/2006        | W11           | 8.3             |
| 18/10/2018 | EL04090402    | 5.09            |                 |               |                 |
| 14/10/2019 | EL04090402    | 5.84            |                 |               |                 |
| 6/7/2020   | EL04090402    | 4.31            |                 |               |                 |
| 5/10/2020  | EL04090402    | 5.40            |                 |               |                 |
| 19/4/2021  | EL04090402    | 5.49            |                 |               |                 |
| 5/11/2021  | EL04090402    | 5.65            |                 |               |                 |
| 9/3/2015   | EL04250402    | 29.9            |                 |               |                 |
| 15/6/2015  | EL04250402    | 27.7            |                 |               |                 |
| 12/2/2018  | EL04250402    | 29.6            |                 |               |                 |
| 18/10/2018 | EL04250402    | 25.5            |                 |               |                 |
| 14/10/2019 | EL04250402    | 23.6            |                 |               |                 |
| 6/7/2020   | EL04250402    | 23.9            |                 |               |                 |
| 5/10/2020  | EL04250402    | 24.0            |                 |               |                 |
| 19/4/2021  | EL04250402    | 25.0            |                 |               |                 |
| 5/11/2021  | EL04250402    | 24.7            |                 |               |                 |
| 1/4/2022   | EL04250402    | 28.8            |                 |               |                 |



**Table S4.** Patras tidal gauge data for the 2017–2022 period [59].

| Date    | Monthly means (m) | Date    | Monthly means (m) |
|---------|-------------------|---------|-------------------|
| 1/2017  | 0.888             | 7/2019  | 0.911             |
| 2/2017  | 0.823             | 8/2019  | 0.907             |
| 3/2017  | 0.83              | 9/2019  | 0.911             |
| 4/2017  | 0.818             | 10/2019 | 0.927             |
| 5/2017  | 0.854             | 11/2019 | 0.982             |
| 6/2017  | 0.846             | 12/2019 | 0.932             |
| 7/2017  | 0.878             | 1/2020  | 0.85              |
| 8/2017  | -                 | 2/2020  | 0.856             |
| 9/2017  | 0.887             | 3/2020  | 0.865             |
| 10/2017 | 0.888             | 4/2020  | 0.859             |
| 11/2017 | 0.907             | 5/2020  | 0.866             |
| 12/2017 | 0.874             | 6/2020  | 0.904             |
| 1/2018  | 0.882             | 7/2020  | 0.897             |
| 2/2018  | 0.883             | 8/2020  | 0.93              |
| 3/2018  | 0.963             | 9/2020  | 0.928             |
| 4/2018  | 0.873             | 10/2020 | 0.91              |
| 5/2018  | 0.89              | 11/2020 | 0.88              |
| 6/2018  | 0.901             | 12/2020 | 0.929             |
| 7/2018  | 0.864             | 1/2021  | 0.922             |
| 8/2018  | 0.921             | 2/2021  | 0.895             |
| 9/2018  | 0.914             | 3/2021  | 0.822             |
| 10/2018 | 0.92              | 4/2021  | 0.845             |
| 11/2018 | 0.938             | 5/2021  | 0.858             |
| 12/2018 | 0.914             | 6/2021  | 0.876             |
| 1/2019  | 0.931             | 7/2021  | 0.894             |
| 2/2019  | 0.873             | 8/2021  | 0.918             |
| 3/2019  | 0.838             | 9/2021  | 0.911             |
| 4/2019  | 0.867             | 10/2021 | 0.911             |
| 5/2019  | 0.877             | 11/2021 | 0.938             |
| 6/2019  | 0.87              | 12/2021 | 0.956             |
